# Supplementary material
Source: ML conference proceedings conference paper supplement (https://proceedings.mlr.press/v151/laroche22a.html)

time to reach  $\bar{\mathcal{J}}_{\pi} = 0.5$

cliff

- $U_{\text{PG-SM}}$
- $U_{\text{PG-ES}}$
- $U_{\text{DI}}$
- $U_{\text{CE}}$
- $U_{\text{MCE}}$

$10^{-2}$

$10^{-1}$

$10^0$

$10^1$

$10^2$

$10^3$

actor learning rate  $\eta$

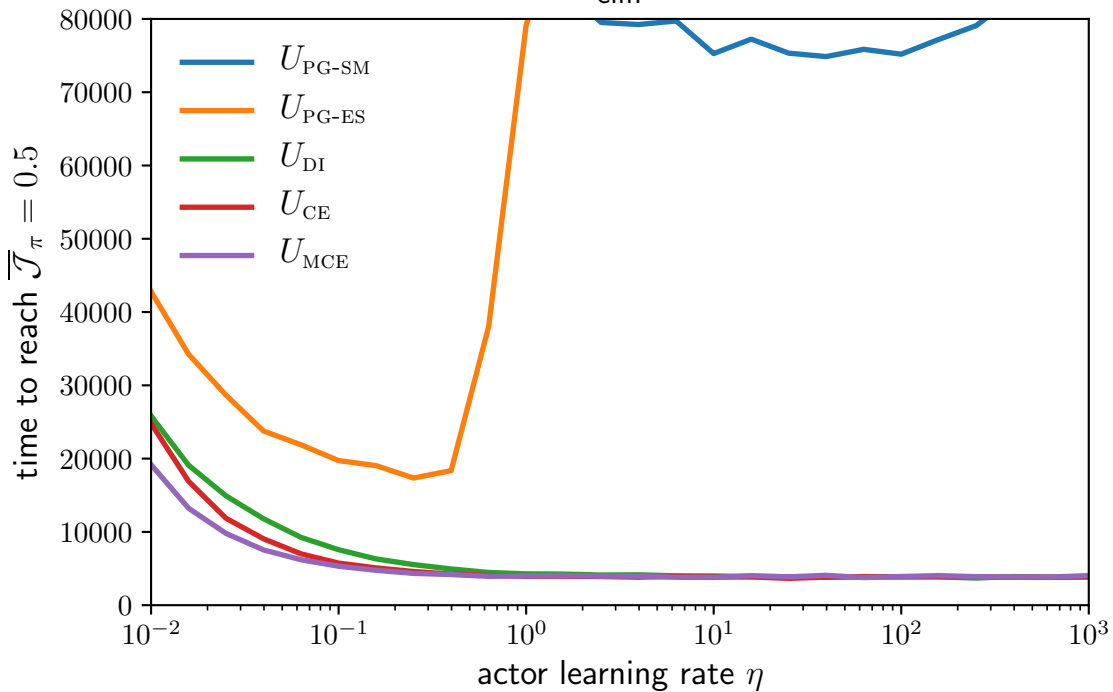

Supplement: Supplementary file 5 [file laroche22a-supp.zip]
