# Supplementary material
Source: ML conference proceedings conference paper supplement (https://proceedings.mlr.press/v151/laroche22a.html)

Random MDPs

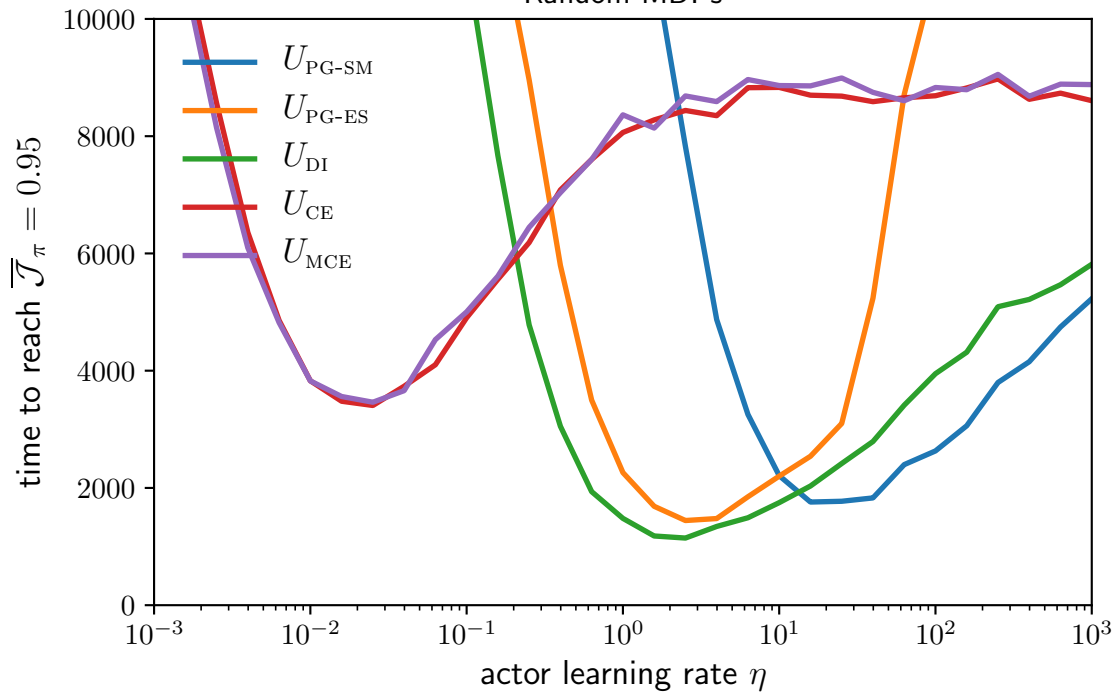

Supplement: Supplementary file 1 [file laroche22a-supp.zip]

time to reach  $\overline{\mathcal{J}}_{\pi} = 0.5$

chain

- $U_{\text{PG-SM}}$
- $U_{\text{PG-ES}}$
- $U_{\text{DI}}$
- $U_{\text{CE}}$
- $U_{\text{MCE}}$

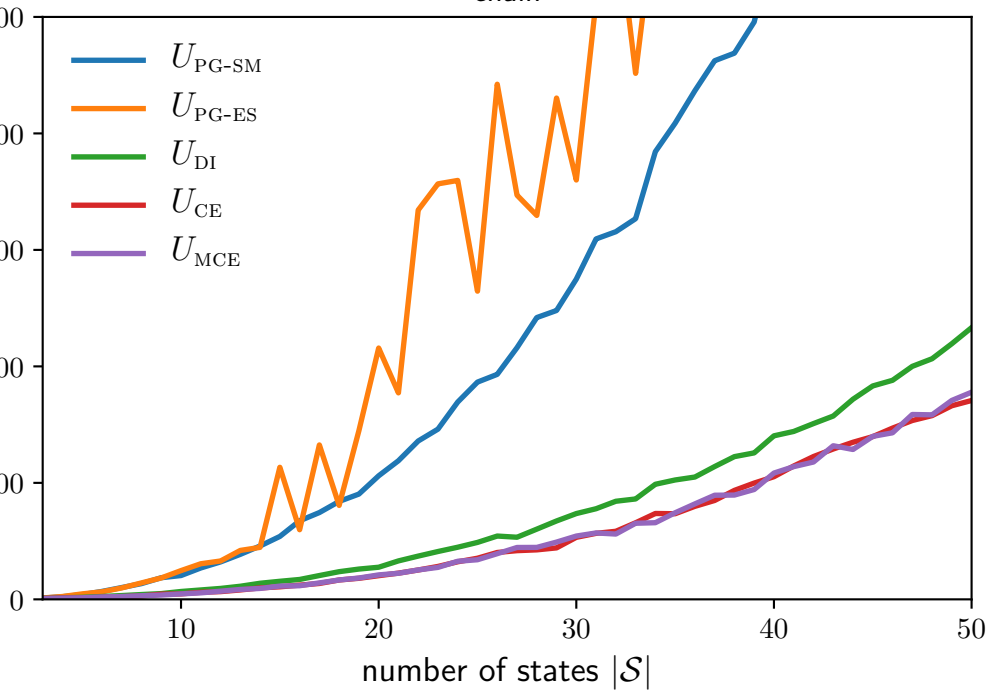

Supplement: Supplementary file 2 [file laroche22a-supp.zip]

time to reach  $\overline{\mathcal{J}}_{\pi} = 0.5$

chain

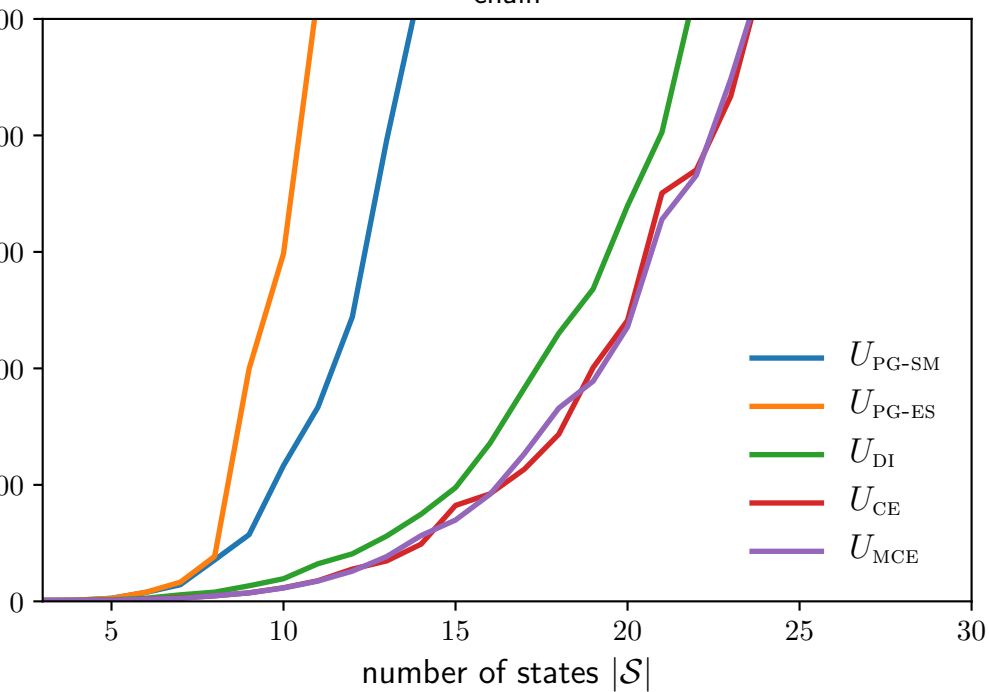

Supplement: Supplementary file 3 [file laroche22a-supp.zip]

chain

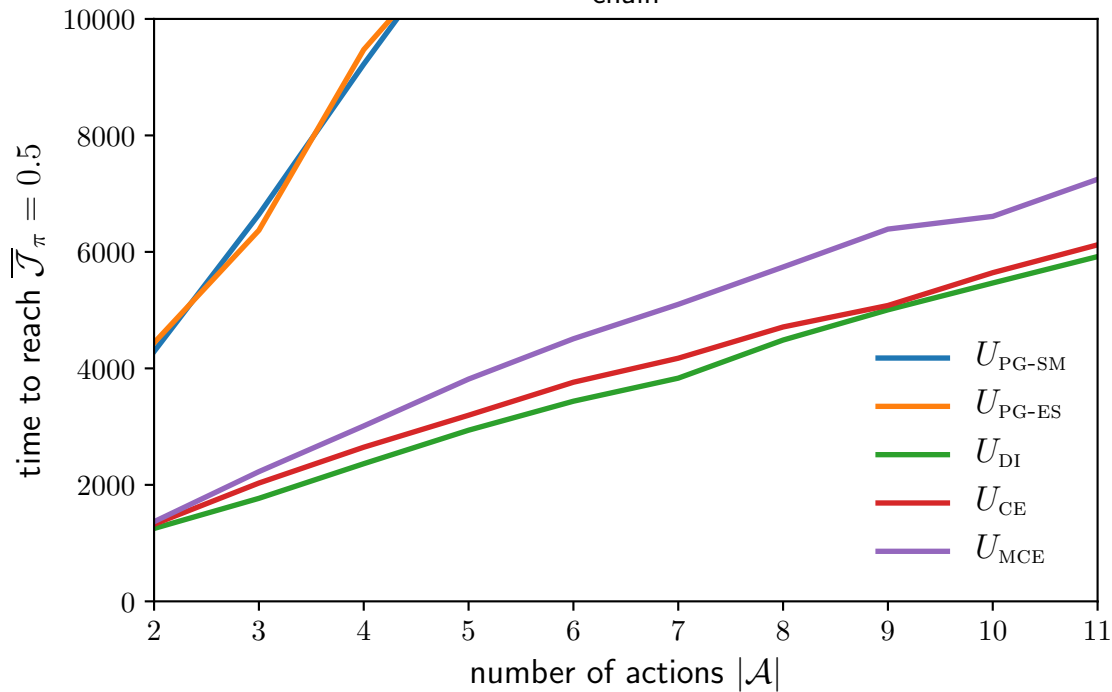

Supplement: Supplementary file 4 [file laroche22a-supp.zip]

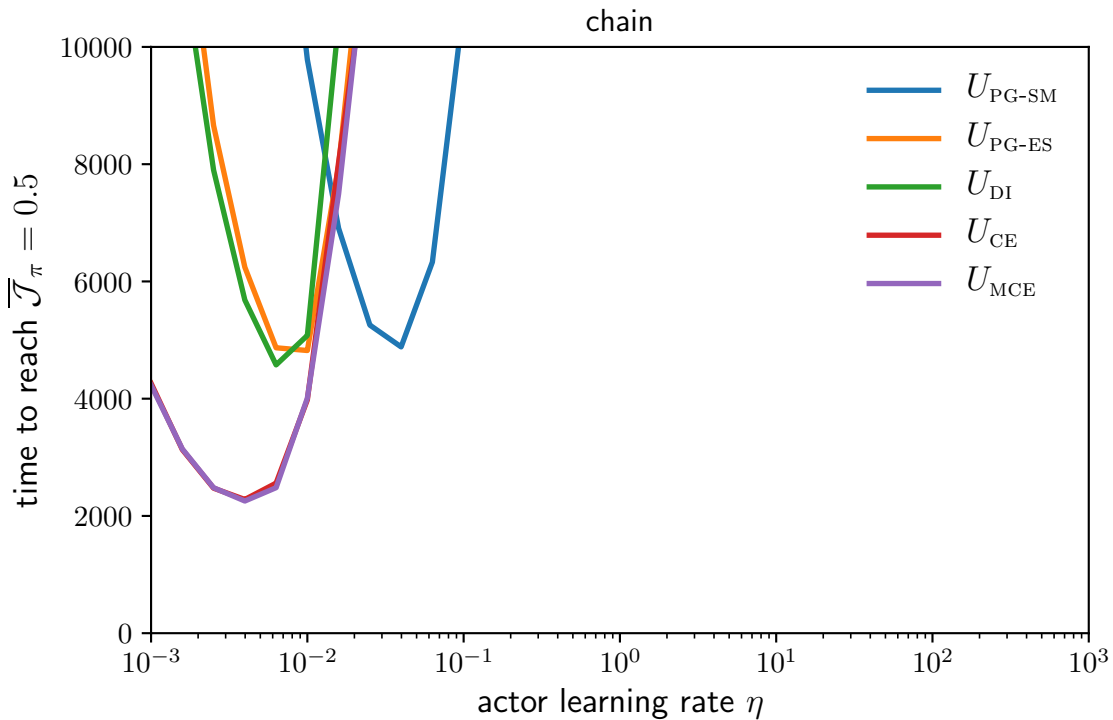

Supplement: Supplementary file 6 [file laroche22a-supp.zip]

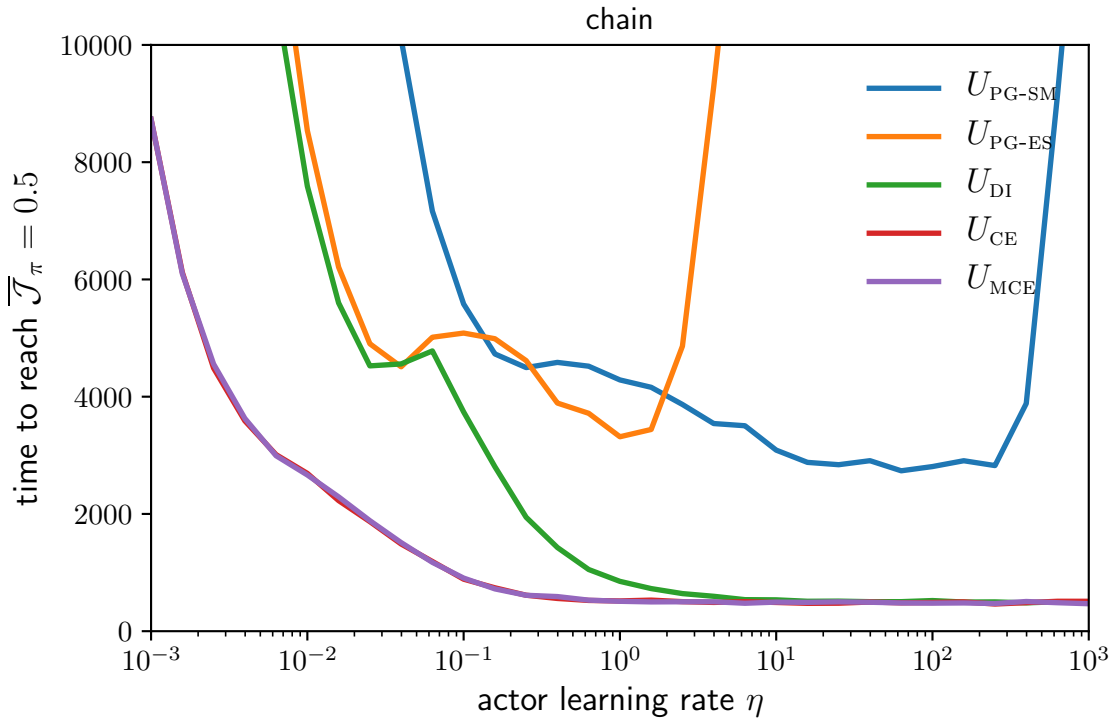

Supplement: Supplementary file 7 [file laroche22a-supp.zip]

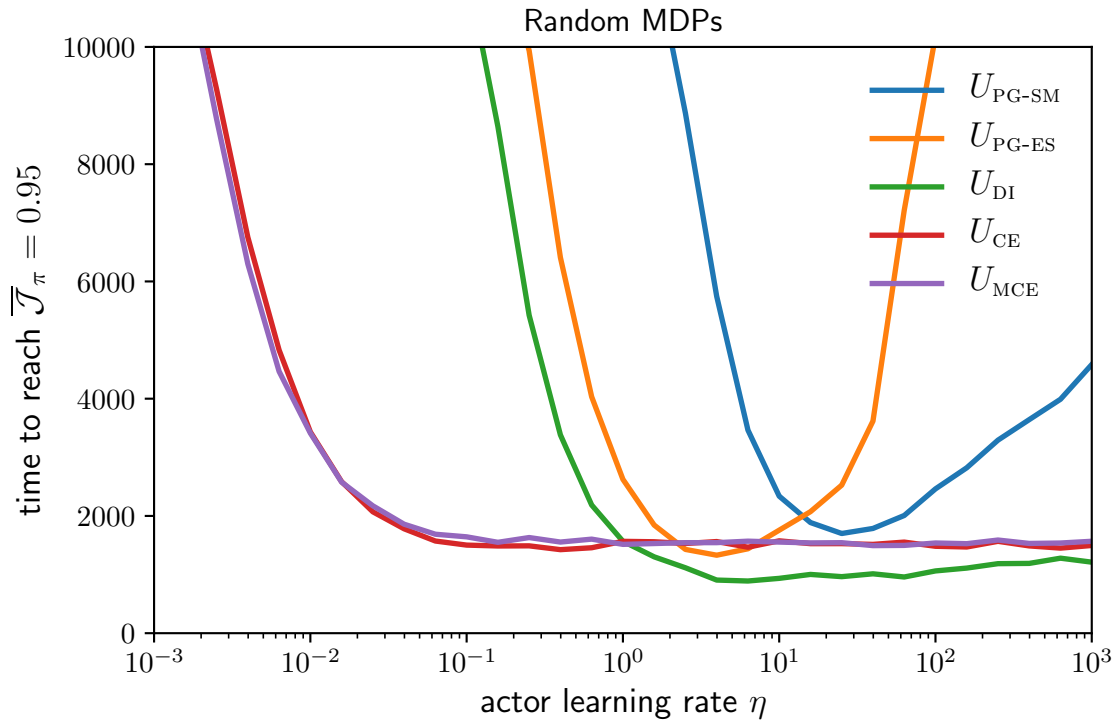

Supplement: Supplementary file 8 [file laroche22a-supp.zip]

Random MDPs

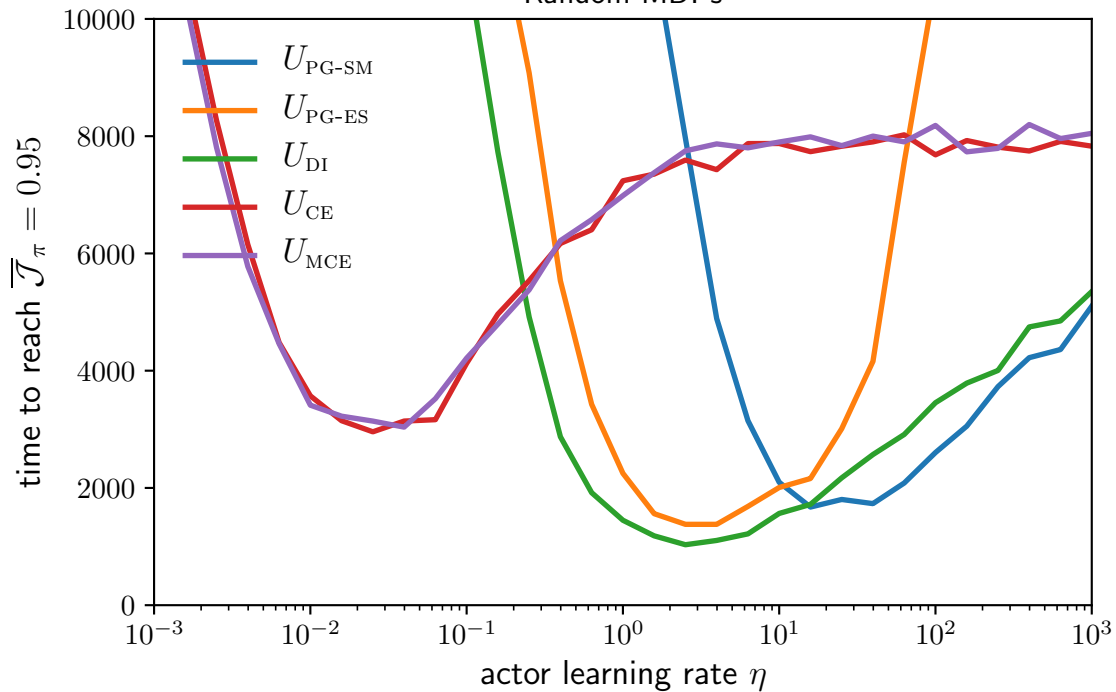

Supplement: Supplementary file 9 [file laroche22a-supp.zip]

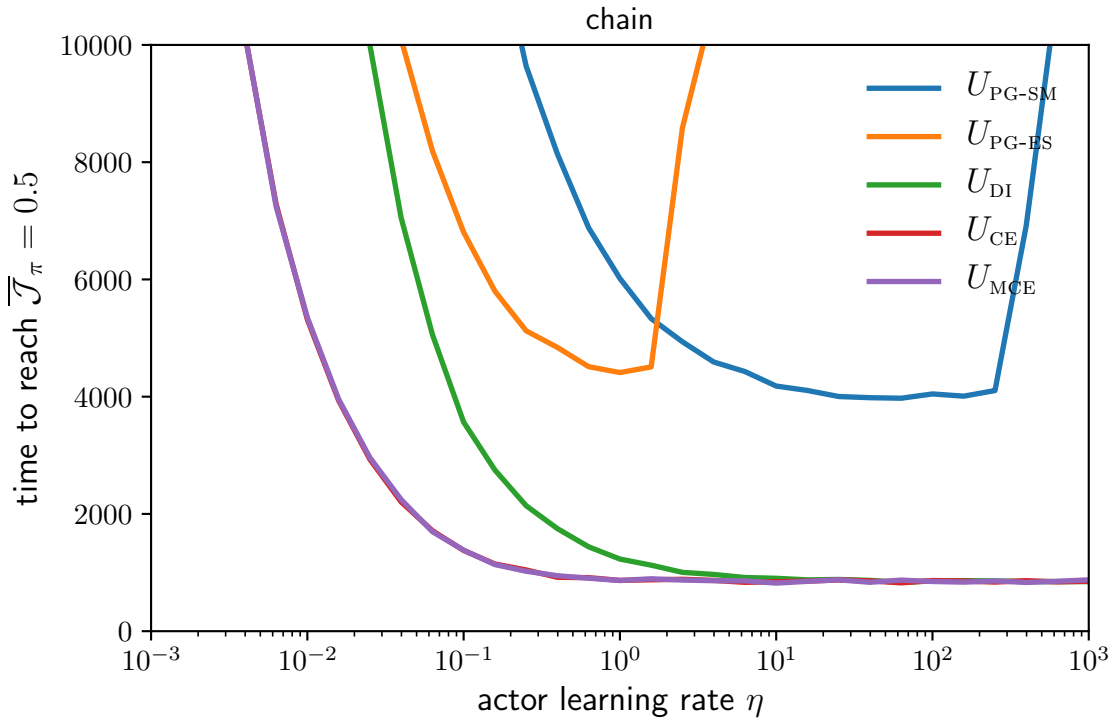

Supplement: Supplementary file 10 [file laroche22a-supp.zip]
